# Supplementary material for: Triboelectric Charging Behaviors of Polyester Films Doped with Titanium Dioxide Nanoparticles of Various Crystal Structures
Source: MDPI journal article supplement (doi:10.3390/app13031468), 2023-01-22
Supplement: s1 [file s1]

## Supplementary Materials

### Triboelectric Charging Behaviors of Polyester Films Doped with Titanium Dioxide Nanoparticles of Various Crystal Structures

Yudai Teramoto, Keita Ando, Satoru Tsukada and Katsuyoshi Hoshino \*

Department of Materials Science, Graduate School of Engineering, Chiba University,  
1-33 Yayoi-cho, Inage-ku, Chiba 263-8522, Japan

\* Correspondence: k\_hoshino@faculty.chiba-u.jp

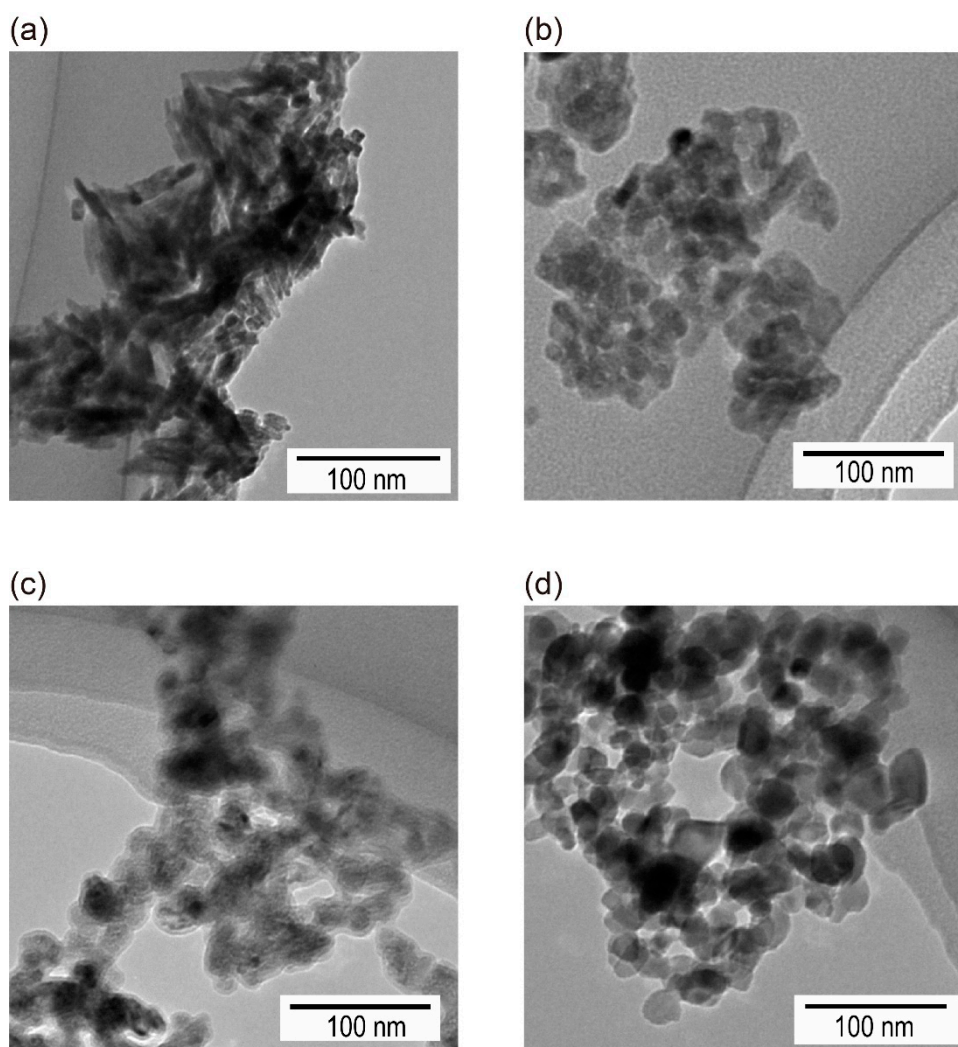

**Figure S1.** TEM images of RUT (a), ANA (b), AMO (c), and P25 (d) TiO<sub>2</sub> nanoparticles.

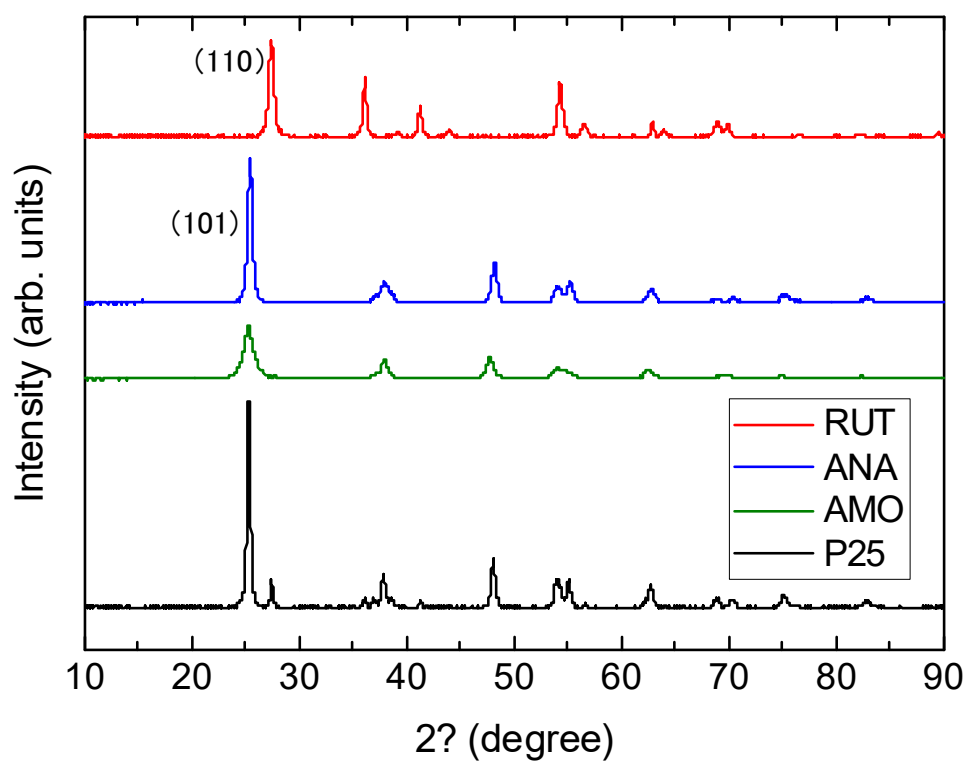

**Figure S2.** X-ray diffraction patterns of RUT, ANA, AMO, and P25 TiO<sub>2</sub> nanoparticles.

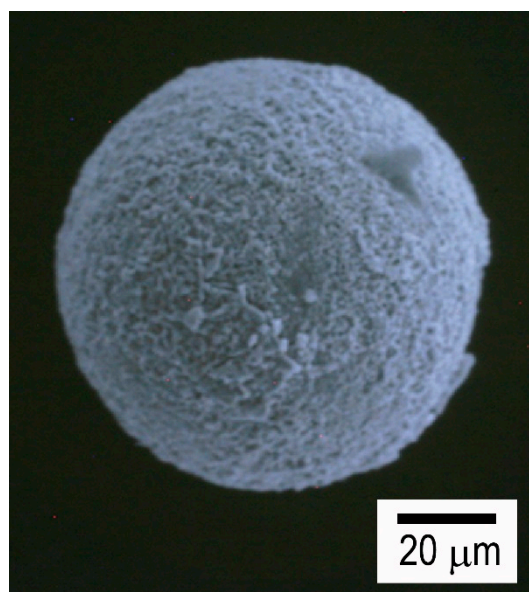

**Figure S3.** SEM image of an iron particle used as the friction counterpart for films.

**Table S1.** Relative permittivity value,  $\epsilon$ , of TiO<sub>2</sub> doped PES film.

| Doping level<br>(wt%) | $\epsilon$ |     |     |     |
|-----------------------|------------|-----|-----|-----|
|                       | RUT        | ANA | AMO | P25 |
| 0                     | 3.4        | 3.4 | 3.4 | 3.4 |
| 5                     | 4.9        | 4.0 | 3.8 | 3.9 |
| 10                    | 4.8        | 4.6 | 5.1 | 8.7 |

**Table S2.** Electrical resistivity value,  $\rho$ , of TiO<sub>2</sub> doped PES film.

| Doping level<br>(wt%) | $10^{-4} \rho (\Omega \text{ sq}^{-1})$ |      |     |      |
|-----------------------|-----------------------------------------|------|-----|------|
|                       | RUT                                     | ANA  | AMO | P25  |
| 0                     | 1.3                                     | 1.3  | 1.3 | 1.3  |
| 1                     | 1.4                                     | 0.97 | 1.2 | 1.2  |
| 5                     | 2.0                                     | 1.1  | 1.2 | 1.1  |
| 10                    | 1.3                                     | 2.6  | 1.9 | 0.76 |
